# Supplementary material for: PDE1 inhibition facilitates proteasomal degradation of misfolded proteins and protects against cardiac proteinopathy
Source: PubMed Central journal article supplement — Sci Adv. 2019 May 22;5(5):eaaw5870. doi: 10.1126/sciadv.aaw5870 (PMC6531002; doi:10.1126/sciadv.aaw5870), 2019-05-22
Supplement: aaw5870_SM.pdf [file aaw5870_SM.pdf]

## Supplementary Materials for

### **PDE1 inhibition facilitates proteasomal degradation of misfolded proteins and protects against cardiac proteinopathy**

Hanming Zhang, Bo Pan, Penglong Wu, Nirmal Parajuli, Mark D. Reikhter, Alfred L. Goldberg, Xuejun Wang\*

\*Corresponding author. Email: xuejun.wang@usd.edu

Published 22 May 2019, *Sci. Adv.* 5, eaaw5870 (2019)

DOI: 10.1126/sciadv.aaw5870

#### **This PDF file includes:**

Fig. S1. Verification of the PDE1A antibody.

Fig. S2. Changes in LV echocardiographic parameters in CryAB<sup>R120G</sup> tg mice at 4 months of age are consistent with HFpEF.

Fig. S3. Representative images of M mode echocardiograms taken from sex- and age-matched NTG and CryAB<sup>R120G</sup> tg mice at the completion of 4 weeks of treatment with the PDE1 inhibitor IC86430 (TG-LSN) or vehicle (TG-Vehicle).

Fig. S4. Hemodynamic analysis from sex- and age-matched NTG and CryAB<sup>R120G</sup> tg mice at the end of 4 weeks of treatment with the PDE1 inhibitor IC86430 (TG-IC) or vehicle (TG-Vehicle).

Fig. S5. Assessments of aortic pressure at the end of 4 weeks of treatment with the PDE1 inhibitor IC86430 (TG-IC) or vehicle (TG-Vehicle).

Fig. S6. Western blot analysis for CryAB levels in the SS fraction of NTG and R120G mouse hearts.

Table S1. Echocardiographic measurements at 4 months of age immediately before IC86430 treatment.

Table S2. Echocardiographic measurements at the end of 4 weeks of treatment.

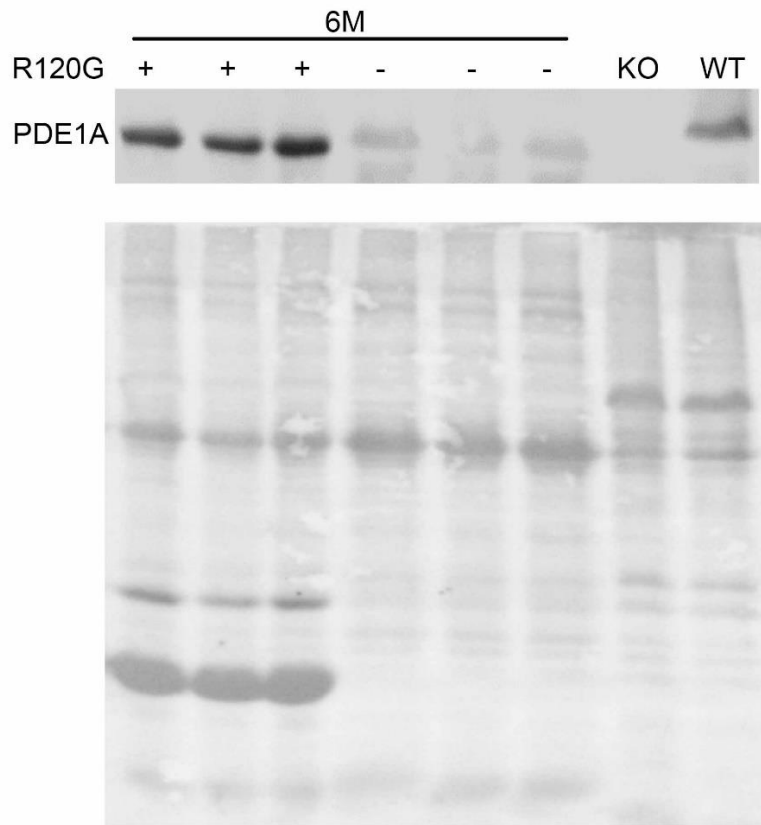

**Fig. S1. Verification of the PDE1A antibody.** Total protein extracts from the brain tissues of wild type (WT) and homozygous PDE1A germline knockout (KO) mice were used for the positive and negative controls in the western blot analyses for PDE1A in the ventricular myocardial tissue from 6 months old CryAB<sup>R120G</sup> tg and non-tg mice. Note that PDE1A expressed in brain is known to have a greater molecular weight than that expressed in the heart. PDE1A western blot image is shown in the upper panel and the lower panel is the stain-free in-gel labeled total protein image to show the loading.

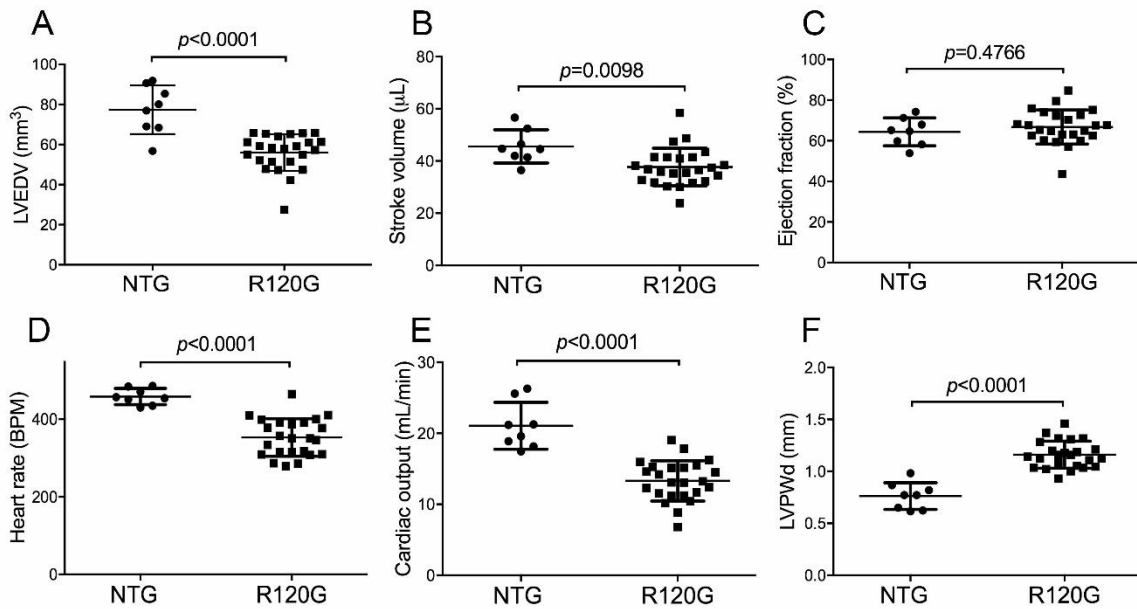

**Fig. S2. Changes in LV echocardiographic parameters in CryAB<sup>R120G</sup> tg mice at 4 months of age are consistent with HFpEF.** Parameters shown are derived from echocardiography on CryAB<sup>R120G</sup> tg (R120G) and sex-matched NTG littermate mice at exactly 4 months of age, i.e., the day immediately before the mini-pump implantation. LVEDV, left ventricular (LV) end-diastolic volume; LVPWd, end-diastolic LV posterior wall thickness. Littermate NTG (4 males + 4 females) and R120G (10 males + 14 females) were used. Two-tailed unpaired *t*-test.

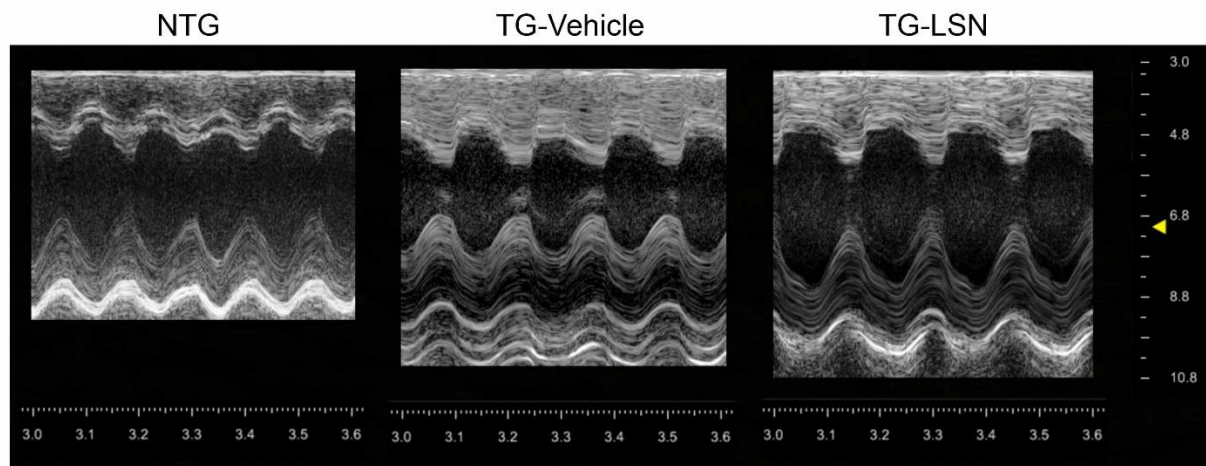

**Fig. S3. Representative images of M mode echocardiograms taken from sex- and age-matched NTG and CryAB<sup>R120G</sup> tg mice at the completion of 4 weeks of treatment with the PDE1 inhibitor IC86430 (TG-LSN) or vehicle (TG-Vehicle).**

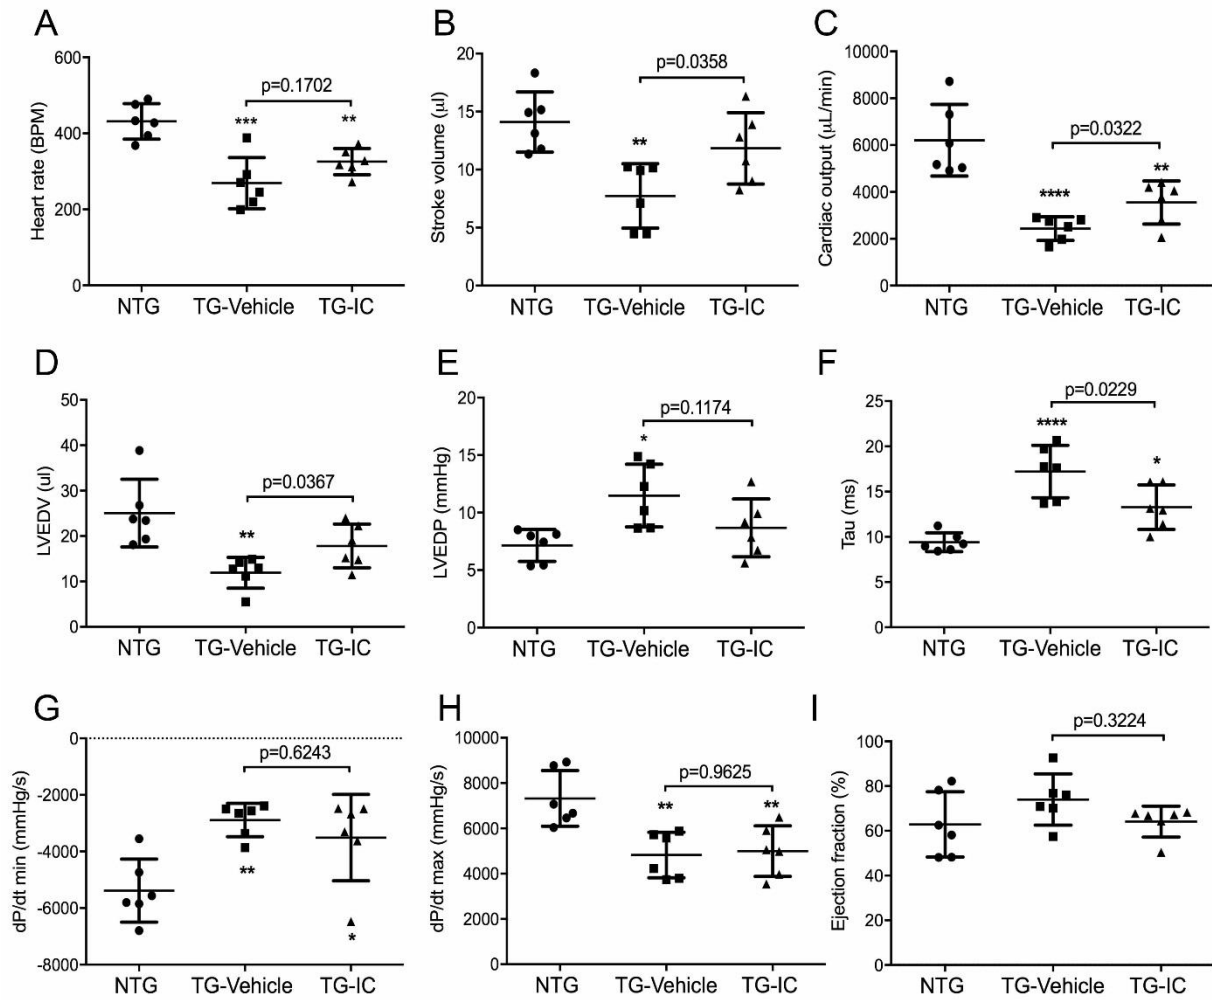

**Fig. S4. Hemodynamic analysis from sex- and age-matched NTG and CryAB<sup>R120G</sup> tg mice at the end of 4 weeks of treatment with the PDE1 inhibitor IC86430 (TG-IC) or vehicle (TG-Vehicle).** NTG (3 males + 3 females), TG-IC (3 males + 3 females), and TG-Vehicle (3 males + 3 females) mice were used. LVEDV, end-diastolic left ventricular (LV) volume. LVEDP, end-diastolic LV pressure. One way ANOVA followed by Tukey's multiple comparisons test. \* $p < 0.05$ , \*\* $p < 0.01$ , \*\*\* $p < 0.001$ , \*\*\*\* $p < 0.0001$  vs. NTG.

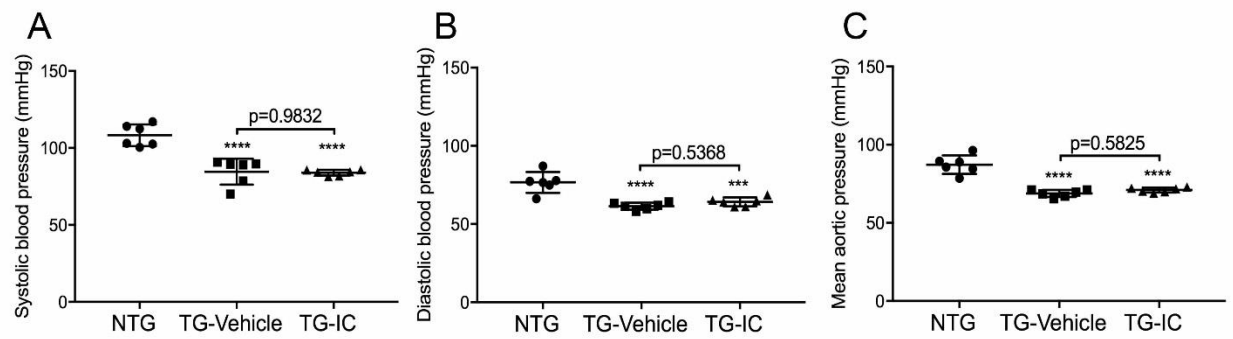

**Fig. S5. Assessments of aortic pressure at the end of 4 weeks of treatment with the PDE1 inhibitor IC86430 (TG-IC) or vehicle (TG-Vehicle).** Littermate NTG (3 males + 3 females), TG-IC (3 males + 3 females), and TG-Vehicle (3 males + 3 females) were used. One way ANOVA followed by Tukey's multiple comparisons test, \*\*\* $p < 0.001$ , \*\*\*\* $p < 0.0001$  vs. NTG.

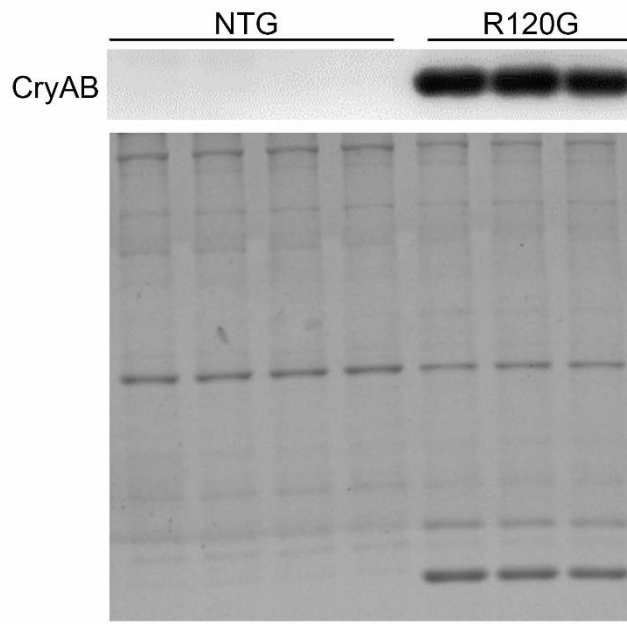

**Fig. S6. Western blot analysis for CryAB levels in the SS fraction of NTG and R120G mouse hearts.** The SS fractions were extracted from ventricular myocardial tissues of ~5 month old non-tg mice and CryAB<sup>R120G</sup> tg mice as described in the main text. The in-lane total protein image collected with the stain-free technology (bottom) is used as the loading control.

**Table S1. Echocardiographic measurements at 4 months of age immediately before IC86430 treatment.**

|                                         | <b>NTG</b>   | <b>TG-Vehicle</b>        | <b>TG- IC86430</b>      |
|-----------------------------------------|--------------|--------------------------|-------------------------|
|                                         | <b>(n=8)</b> | <b>(n=13)</b>            | <b>(n=11)</b>           |
| <b>Body Weight (BW, g)</b>              | 29.4±5.1     | 29.4±5.9                 | 27.6±5.5                |
| <b>Heart Rate (bpm)</b>                 | 458±21       | 341±40 <sup>§</sup>      | 373±49 <sup>‡</sup>     |
| <b>CO (ml/min)</b>                      | 21.1±3.3     | 13.8±2.5 <sup>§</sup>    | 14.4±2.5 <sup>§</sup>   |
| <b>SV (µl)</b>                          | 45.6±6.4     | 36.84±8.3                | 38.7±5.8                |
| <b>LVVd (mm<sup>3</sup>)</b>            | 77.41±12.2   | 55.10±10.42 <sup>§</sup> | 57.14±7.65 <sup>‡</sup> |
| <b>LVV<sub>s</sub> (mm<sup>3</sup>)</b> | 32.48±10.09  | 18.91±6.23 <sup>†</sup>  | 18.70±5.00 <sup>‡</sup> |
| <b>LV EF (%)</b>                        | 64.40±6.87   | 66.68±7.52               | 66.89±9.72              |
| <b>LV FS (%)</b>                        | 34.67±4.89   | 36.49±6.17               | 37.12±6.90              |
| <b>LVAWd (mm)</b>                       | 0.76±0.121   | 1.20±0.10 <sup>§</sup>   | 1.15±0.11 <sup>§</sup>  |
| <b>LVAW<sub>s</sub> (mm)</b>            | 1.04±0.10    | 1.48±0.15 <sup>§</sup>   | 1.50±0.10 <sup>§</sup>  |
| <b>LVIDd (mm)</b>                       | 4.14±0.29    | 3.61±0.26 <sup>†</sup>   | 3.63±0.18 <sup>†</sup>  |
| <b>LVID<sub>s</sub> (mm)</b>            | 2.90±0.35    | 2.35±0.36 <sup>†</sup>   | 2.39±0.27 <sup>†</sup>  |
| <b>LVPWd (mm)</b>                       | 0.76±0.13    | 1.17±0.14 <sup>§</sup>   | 1.11±0.11 <sup>§</sup>  |
| <b>LVPW<sub>s</sub> (mm)</b>            | 1.09±0.08    | 1.49±0.16 <sup>§</sup>   | 1.50±0.10 <sup>§</sup>  |
| <b>LV Mass (mg)</b>                     | 95.0±20.6    | 150.1±30.3 <sup>†</sup>  | 140.2±21.2 <sup>§</sup> |
| <b>LV Mass/BW (mg/g)</b>                | 3.23±0.46    | 4.95±0.99 <sup>‡</sup>   | 5.19±0.94 <sup>§</sup>  |

LVIDd, end-diastolic left ventricular (LV) internal diameter; LVID<sub>s</sub>, end-systolic LVID, end-diastolic LV posterior wall thickness; LVPW<sub>s</sub>, end-systolic LVPW; LVAWd, end-diastolic anterior wall thickness; LVAW<sub>s</sub>, end-systolic LVAW; FS, fractional shortening; EF, ejection fraction; LVVd, end-diastolic LV volume; LVV<sub>s</sub>, end-systolic LVV; SV, stroke volume; CO, cardiac output. For all parameters, there is no statistically significant difference between the TG-Vehicle group and the TG- IC86430 group immediately before IC86430 treatment.

\*p<0.05, †p<0.01, ‡p<0.001, §p<0.0001 vs. NTG; one-way ANOVA followed by Tukey's multiple comparison tests. For all parameters, the differences between TG-IC and TG-Vehicle groups are not statistically significant.



**Table S2. Echocardiographic measurements at the end of 4 weeks treatment.**

|                                         | NTG<br>(n=8) | TG-Vehicle<br>(n=8)      | TG- IC86430<br>(n=11)   |
|-----------------------------------------|--------------|--------------------------|-------------------------|
| <b>Body Weight (BW, g)</b>              | 30.5±4.2     | 29.8±5.0                 | 29.7±4.3                |
| <b>Heart Rate (bpm)</b>                 | 462±53       | 361±59 <sup>‡</sup>      | 344±50 <sup>§</sup>     |
| <b>CO (ml/min)</b>                      | 21.5±4.1     | 12.5±0.9 <sup>#</sup>    | 16.1±3.2 <sup>‡*</sup>  |
| <b>SV (μl)</b>                          | 46.5±10.4    | 36.3±4.9 <sup>  </sup>   | 46.5±7.1*               |
| <b>LVVd (mm<sup>3</sup>)</b>            | 73.54±12.5   | 57.83±4.99 <sup>  </sup> | 72.63±13.55*            |
| <b>LVV<sub>s</sub> (mm<sup>3</sup>)</b> | 27.08±4.39   | 21.59±4.61               | 28.11±8.61              |
| <b>LV EF (%)</b>                        | 59.76±4.19   | 62.77±7.19               | 62.87±6.63              |
| <b>LV FS (%)</b>                        | 31.42±2.86   | 33.58±5.72               | 33.82±4.73              |
| <b>LVAWd (mm)</b>                       | 0.75±0.06    | 1.20±0.07 <sup>#</sup>   | 1.07±0.06 <sup>#†</sup> |
| <b>LVAW<sub>s</sub> (mm)</b>            | 1.05±0.05    | 1.49±0.08 <sup>#</sup>   | 1.35±0.08 <sup>#†</sup> |
| <b>LVIDd (mm)</b>                       | 3.95±0.31    | 3.71±0.09                | 4.07±0.28*              |
| <b>LVID<sub>s</sub> (mm)</b>            | 2.75±0.25    | 2.53±0.27                | 2.89±0.40               |
| <b>LVPWd (mm)</b>                       | 0.78±0.08    | 1.18±0.11 <sup>#</sup>   | 1.07±0.08 <sup>#*</sup> |
| <b>LVPW<sub>s</sub> (mm)</b>            | 1.05±0.07    | 1.51±0.11 <sup>#</sup>   | 1.36±0.10 <sup>#*</sup> |

LVIDd, end-diastolic left ventricular (LV) internal diameter; LVID<sub>s</sub>, end-systolic LVID, end-diastolic LV posterior wall thickness; LVPW<sub>s</sub>, end-systolic LVPW; LVAWd, end-diastolic anterior wall thickness; LVAW<sub>s</sub>, end-systolic LVAW; FS, fractional shortening; EF, ejection fraction; LVVd, end-diastolic LV volume; LVV<sub>s</sub>, end-systolic LVV; SV, stroke volume; CO, cardiac output.

\* $p < 0.05$ , <sup>†</sup> $p < 0.01$  vs. TG-Vehicle,

<sup>||</sup> $p < 0.05$ , <sup>‡</sup> $p < 0.01$ , <sup>§</sup> $p < 0.005$ , <sup>#</sup> $p < 0.001$  vs. NTG, one-way ANOVA followed by Tukey's multiple comparisons test.
